# Supplementary material for: Molecular basis of cell membrane adaptation in daptomycin-resistant Enterococcus faecalis
Source: JCI journal article supplement (doi:10.1172/jci.insight.173836), 2024-10-15
Supplement: sd1 [file 1]

A

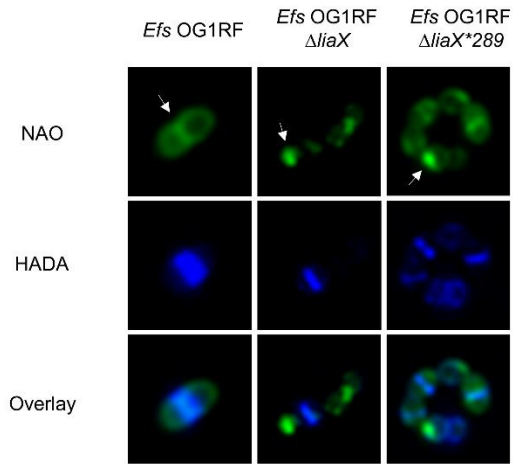

B

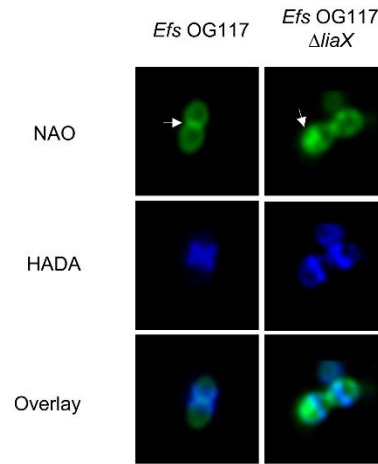

C

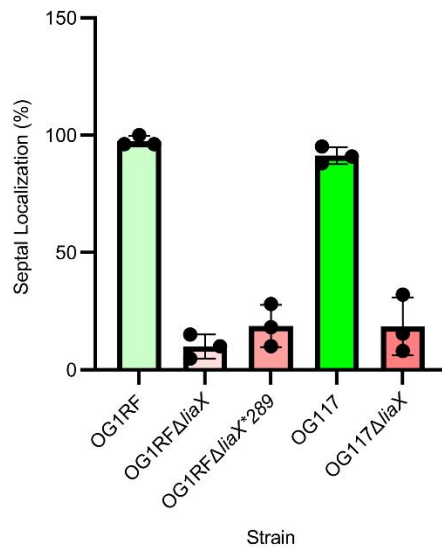

**Supplementary Figure 1: NAO and HADA co-localization**

A) NAO (top row), HADA (middle row) and overlay (bottom row) images of *Efs* OG1RF with or without deletion of *liaX* or *liaX*\*289. White arrows represent anionic phospholipid microdomains at mid-cell or non-mid-cell locations.

B) NAO (top row), HADA (middle row) and overlay (bottom row) images of *Efs* OG117 with or without deletion of *liaX*. White arrows represent anionic phospholipid microdomains at mid-cell or non-mid-cell locations.

C) Quantification of septal localization per strain, minimum >20 cells/strain, n=3.

Whole images were adjusted for "Black Balance" per BZ-X800 Image Analysis Software with individual representative selected.

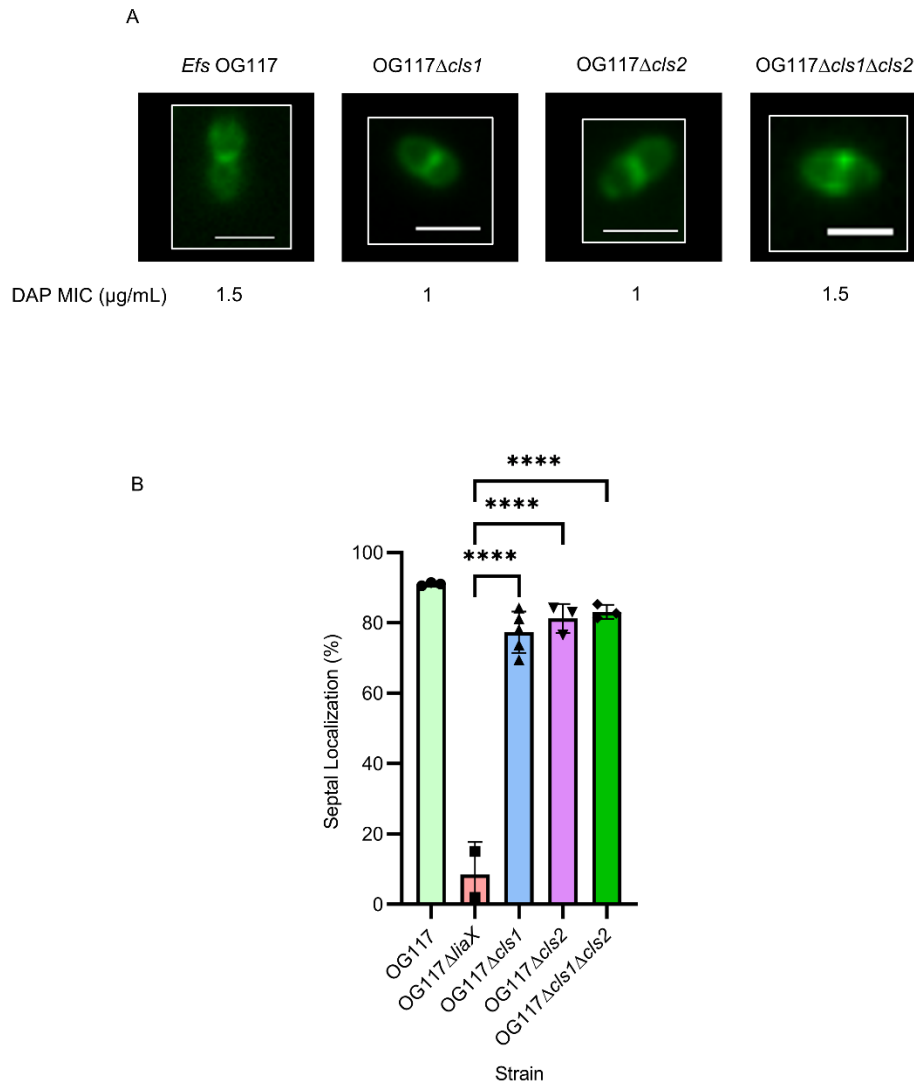

Supplementary Figure 2: Characterization of *cls* deletions in DAP-S *Efs* OG117.

A) Evaluation of anionic phospholipid localization using NAO staining in deletions of *cls1* and/or *cls2* in DAP-S *Efs* OG117 with DAP MIC (below image).

(B) Quantification of septal localization of anionic phospholipid microdomains with NAO in *cls* mutant derivatives of *Efs* OG117 by counting a minimum of 50 cells per replicate (n=3-6 replicates). \*\*p<0.01, \*\*\*p<0.001, \*\*\*\*p<0.0001 via one-way ANOVA with multiple comparisons

Whole images were adjusted for "Black Balance" per BZ-X800 Image Analysis Software with individual representative selected.

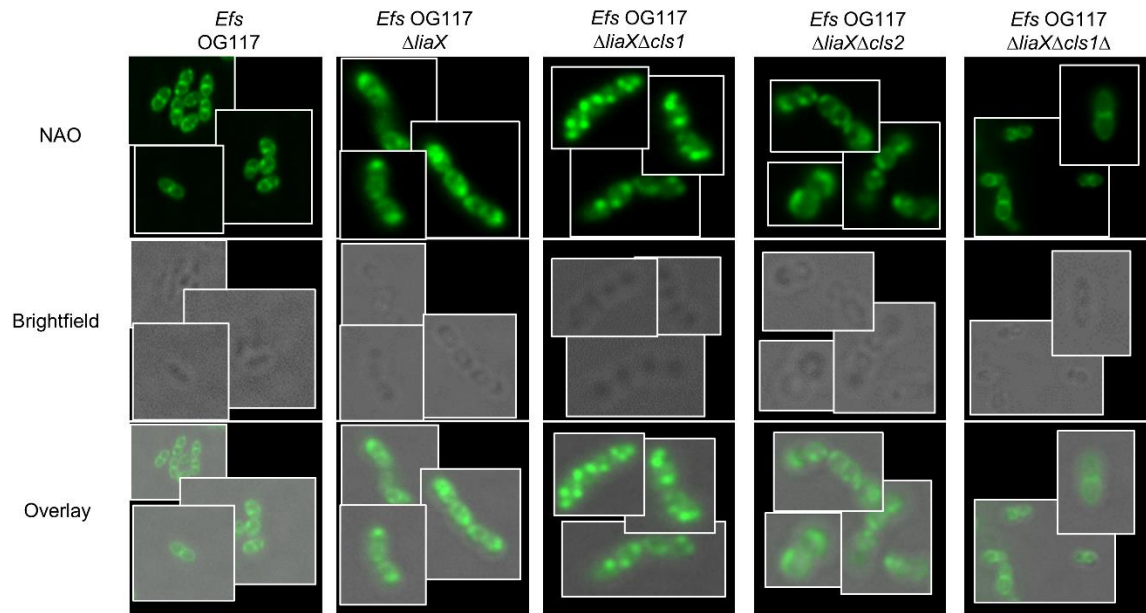

*Supplementary Figure 3: Additional Images of cls mutants*

Evaluation of anionic phospholipid domains using NAO staining (top row) in deletions of *cls* mutants with brightfield image (middle row) and overlay (bottom row). Whole images were adjusted for "Black Balance" per BZ-X800 Image Analysis Software with individual representative selected.

*Efs* OG117 $\Delta$ *liaX* $\Delta$ *cls1* $\Delta$ *cls2*

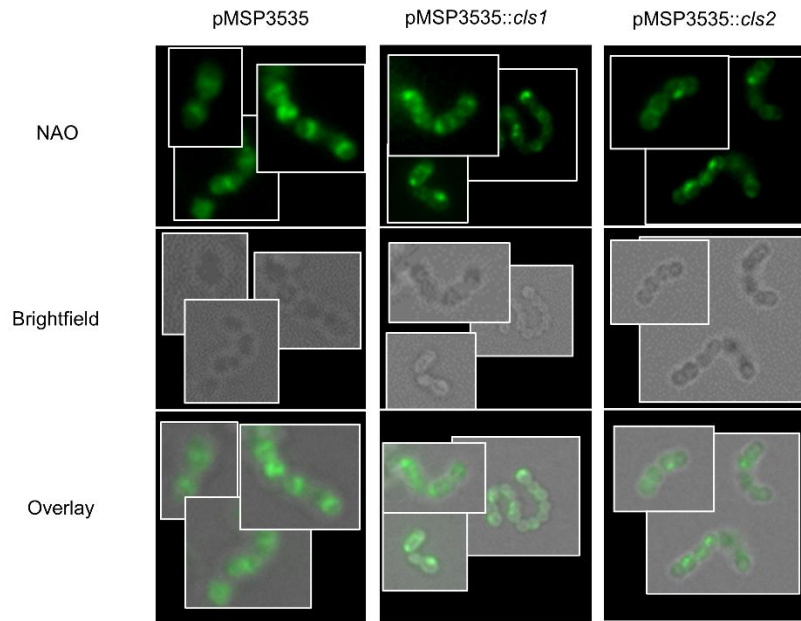

*Supplementary Figure 4: Additional images of cls mutants and trans-complementation*

Evaluation of anionic phospholipid domains using NAO staining (top row) in deletions of *cls* mutants complemented with either *cls1* or *cls2* in pMSP3535 with brightfield image (middle row) and overlay (bottom row). Whole images were adjusted for "Black Balance" per BZ-X800 Image Analysis Software with individual representative selected.

A

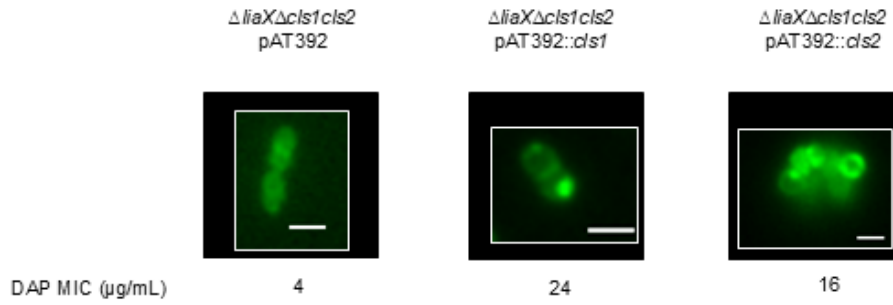

B

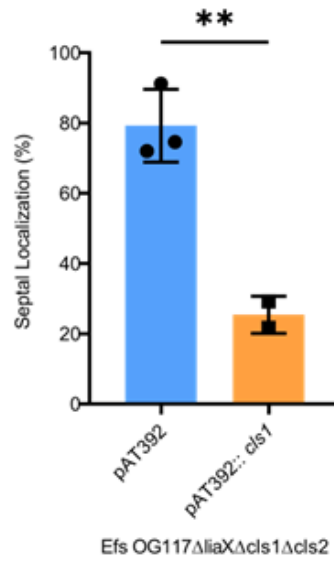

Supplementary Figure 5: Anionic phospholipid localization using NAO staining in DAP-R *E. faecalis* cls mutant trans complementation (A) *E. faecalis* OG117ΔliaXΔcls1Δcls2 transformed with pAT392 and derivatives containing *cls1* or *cls2* from. Scale bar (white) at 2µm (B) Quantification of septal localization of anionic phospholipid microdomains with NAO staining in *E. faecalis* OG117ΔliaXΔcls1Δcls2 transformed with pAT392 and derivatives containing *cls1*. \*p<0.05; \*\*p<0.001, n=2 via t-test Whole images were adjusted for "Black Balance" per BZ-X800 Image Analysis Software with individual representative selected.

A

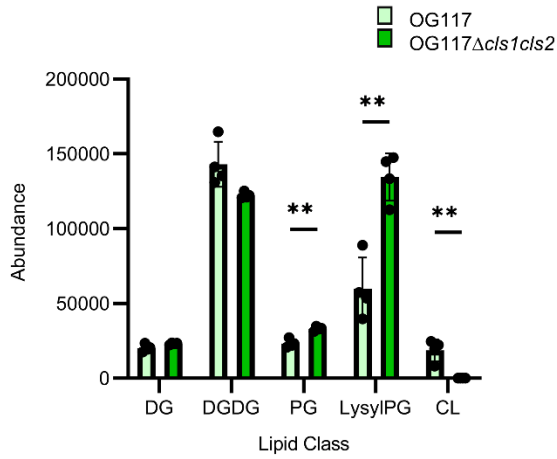

B

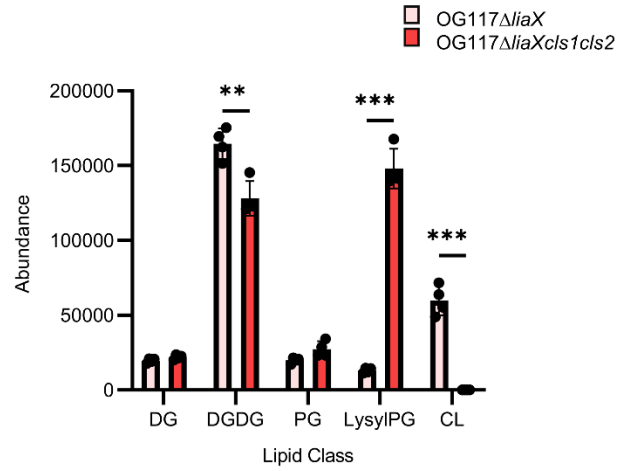

Supplementary Figure 6: Lipid Class Changes in cls double deletion strains

Quantification of cardiolipin content in in double cls deletions in DAP-S *E. faecalis* OG117 (A) and DAP-R *E. faecalis* OG117 $\Delta$ liaX (B)  
 DG= diacylglycerol, DGDG = diglycodiacylglycerol, PG = phosphatidylglycerol, LysylPG = lysyl-phosphatidylglycerol, CL = cardiolipin  
 \*p<0.05, n=4 via individual unpaired t-tests

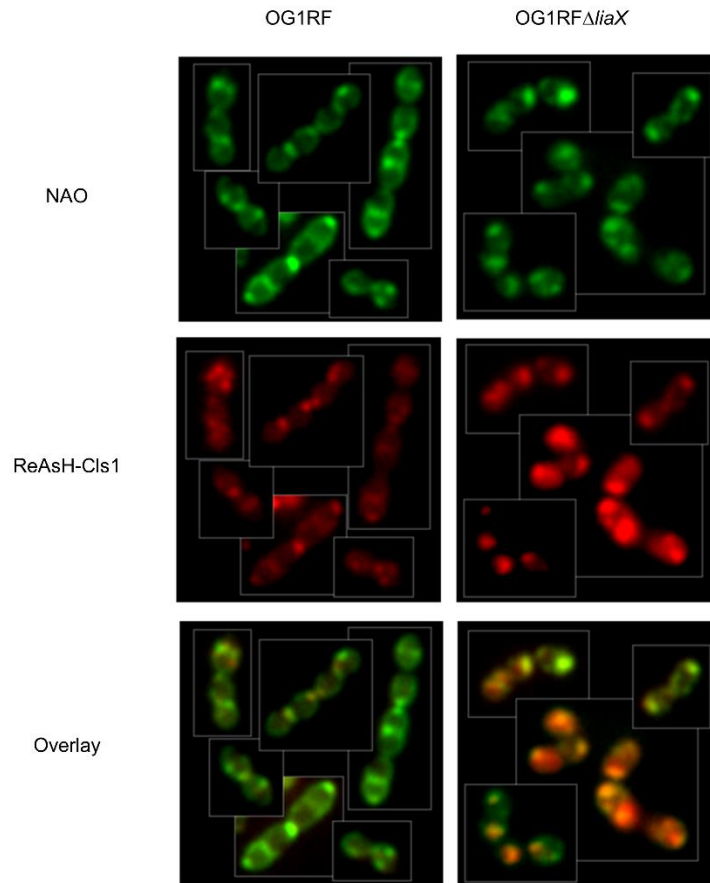

*Supplementary Figure 7: Additional ReAsH-Clis1-NAO images*

Representative images of NAO staining (top panel), tetracycline-tagged Clis1 with ReAsH reagent (red fluorescence, middle panel) and overlay of both images (bottom panel) for strain listed with expression of *cls1-ReAsH* expressed from pMSP3535. Whole images were adjusted for "Black Balance" per BZ-X800 Image Analysis Software with individual representative selected.

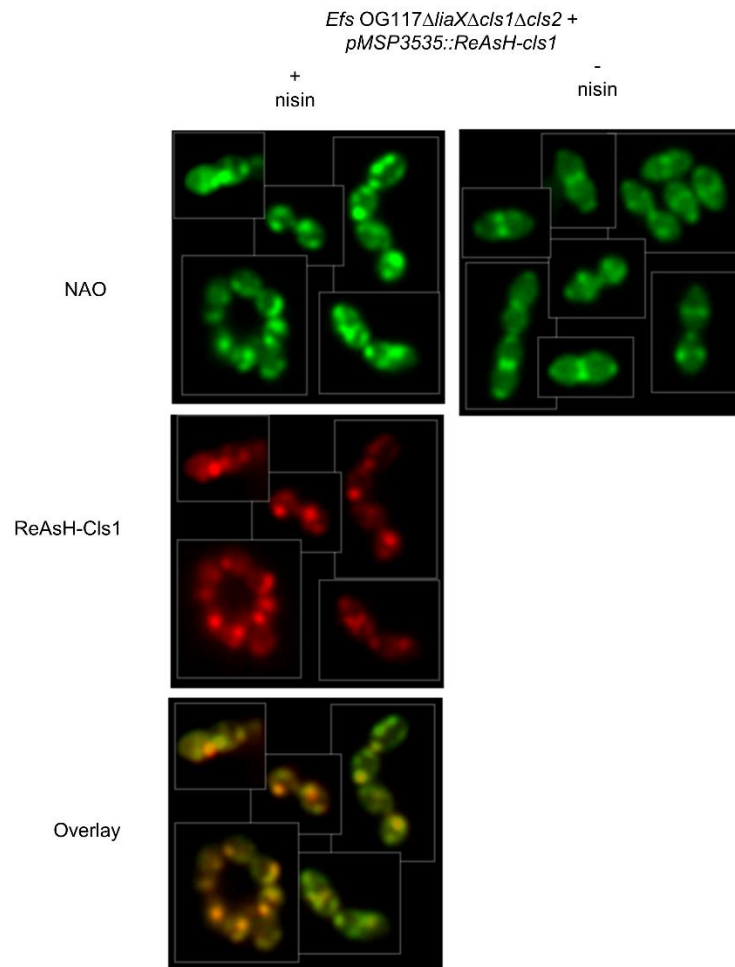

*Supplementary Figure 8: Additional ReAsH-NAO pMSP3535 complementation images*

Representative images of NAO staining (top panel), tetracycline-tagged Cls1 with ReAsH reagent (red fluorescence, middle panel) and overlay of both images (bottom panel) for strain listed with expression of *cls1-ReAsH* expression from pMSP3535 with or without 50ng/mL nisin induction. Whole images were adjusted for "Black Balance" per BZ-X800 Image Analysis Software with individual representative selected.



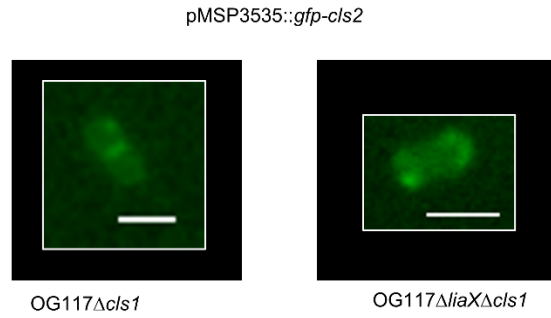

*Supplementary Figure 9. Cls2 re-localizes in the absence of Cls1 in DAP-S and DAP-R E. faecalis strains.*

Cl<sub>s</sub>2 was tagged with GFP and expressed on pMSP3535 in either DAP-S *E. faecalis* OG117Δ*cls1* or DAP-R *E. faecalis* OG117Δ*liaX*Δ*cls1*. Introduction of *gfp-cls2* highlights the septal and non-septal localization of Cl<sub>s</sub>2 in DAP-S OG117Δ*cls1* and DAP-R OG117Δ*liaX*Δ*cls1*, respectively. Scale bar (white) at 2 μm.

Whole images were adjusted for "Black Balance" per BZ-X800 Image Analysis Software with individual representative selected.

A

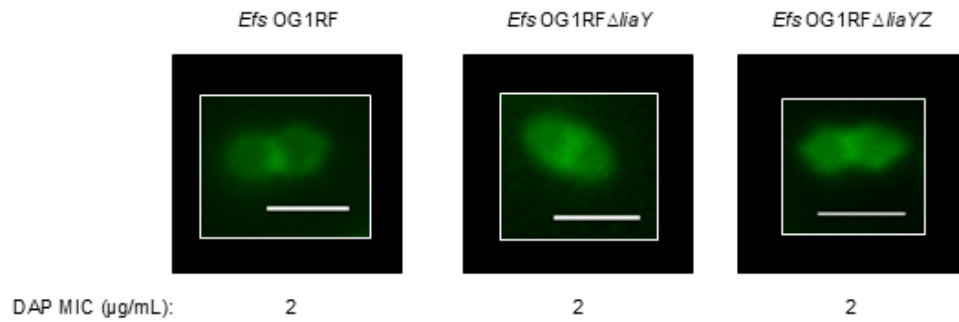

B

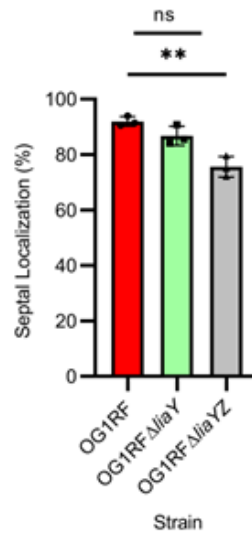

Supplementary Figure 10. Deletions of *liaYZ* in DAP-S *E. faecalis* OG1RF in which the *LiaFSR* system is not activated.

(A) NAO staining of anionic phospholipid microdomains staining with of *Efs* OG1RF, *Efs* OG1RFΔ*liaY*, and *Efs* OG1RFΔ*liaYZ* showing septal localization of microdomains without changes in DAP MIC. Scale bar (white) at 2 μm.

(B) Quantification of septal localization of anionic phospholipid microdomains with NAO staining in *c/s* mutants. \*\*p<0.001 via one way ANOVA with multiple comparisons

Whole images were adjusted for "Black Balance" per BZ-X800 Image Analysis Software with individual representative selected.

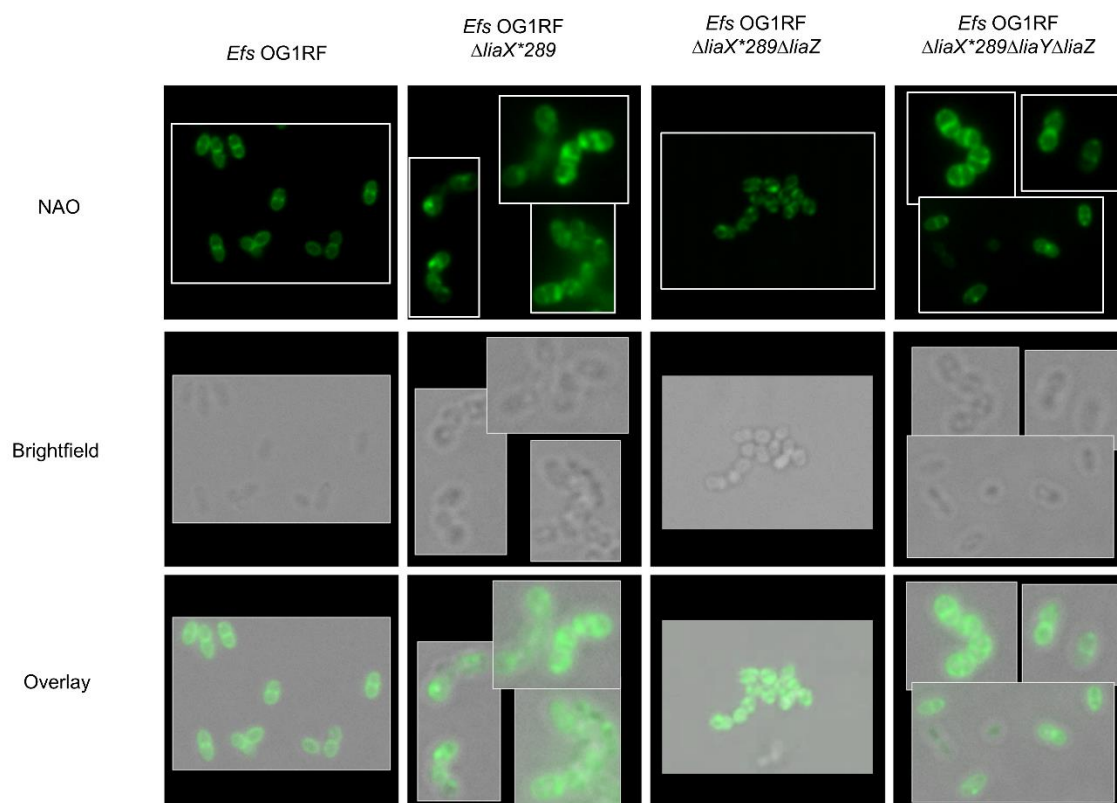

*Supplementary Figure 11: Additional images of liaYZ mutants*

Evaluation of anionic phospholipid domains using NAO staining (top row) in deletions of *liaYZ* mutants with brightfield image (middle row) and overlay (bottom row). Whole images were adjusted for "Black Balance" per BZ-X800 Image Analysis Software.

A

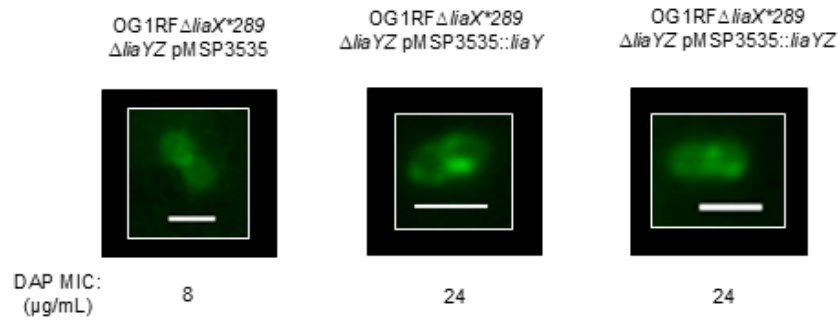

B

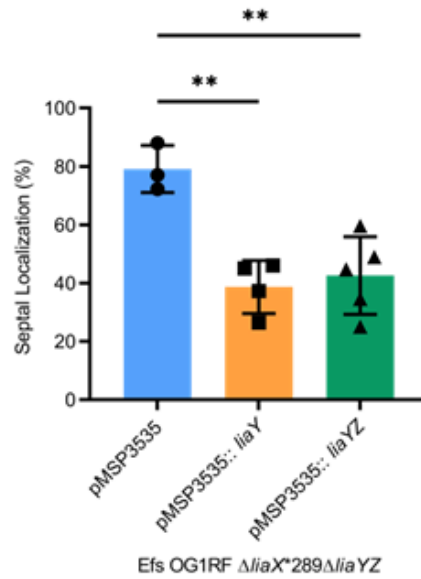

Supplementary Figure 12: Anionic phospholipid localization using NAO staining in DAP-R *E. faecalis* OG1RF  $\Delta$ *liaX*\*289  $\Delta$ *liaYZ* and derivatives

(A) *E. faecalis* OG1RF  $\Delta$ *liaX*\*289  $\Delta$ *liaYZ* mutant transformed with pMSP3535 and derivatives containing *liaY* and *liaYZ*. Scale bar (white) at 2 μm

(B) Quantification of septal localization of anionic phospholipid microdomains with NAO staining in *E. faecalis* OG1RF  $\Delta$ *liaX*\*289  $\Delta$ *liaYZ* mutant transformed with pMSP3535 and derivatives containing *liaY* and *liaYZ*. \*\*p<0.001 via one way ANOVA with multiple comparisons

Whole images were adjusted for "Black Balance" per BZ-X800 Image Analysis Software with individual representative selected.

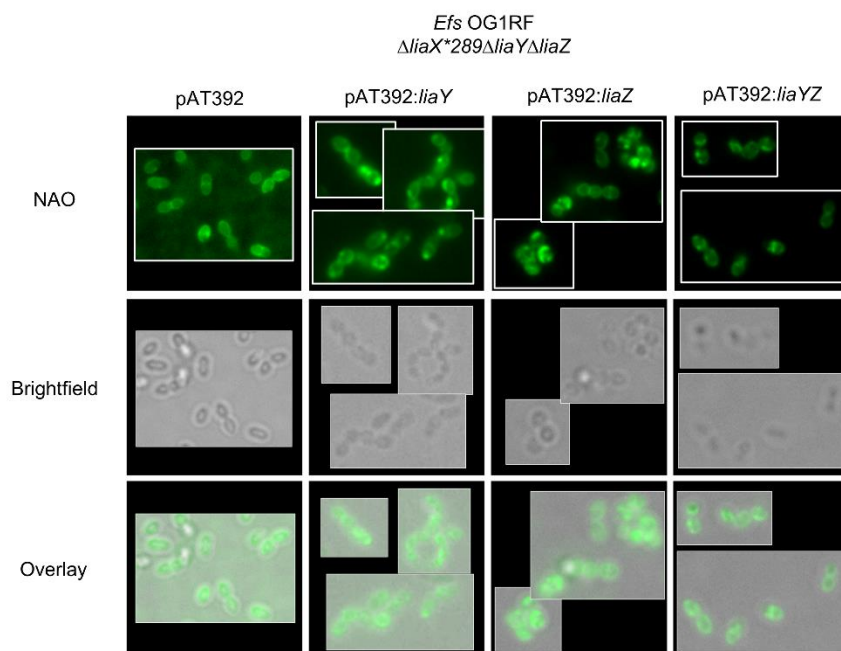

*Supplementary Figure 13: Additional Images for liaYZ trans-complementation*

Evaluation of anionic phospholipid domains using NAO staining (top row) in deletions of *liaYZ* mutants complemented with pAT392::*liaYZ* with brightfield image (middle row) and overlay (bottom row). Whole images were adjusted for “Black Balance” per BZ-X800 Image Analysis Software.

*Efs* OG1RF  
 $\Delta liaX^{*289} \Delta liaY \Delta liaZ$   
pAT392:*liaZ*

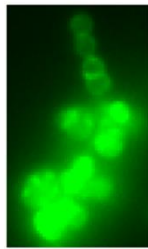

DAP MIC:  
( $\mu\text{g/mL}$ )

8

*Supplementary Figure 14. trans expression of liaZ causes clumping phenotype*

Representative image of “clumping” phenotype of cells expressing *liaZ* from pAT392 and stained with NAO. Whole images were adjusted for “Black Balance” per BZ-X800 Image Analysis Software with individual representative selected.

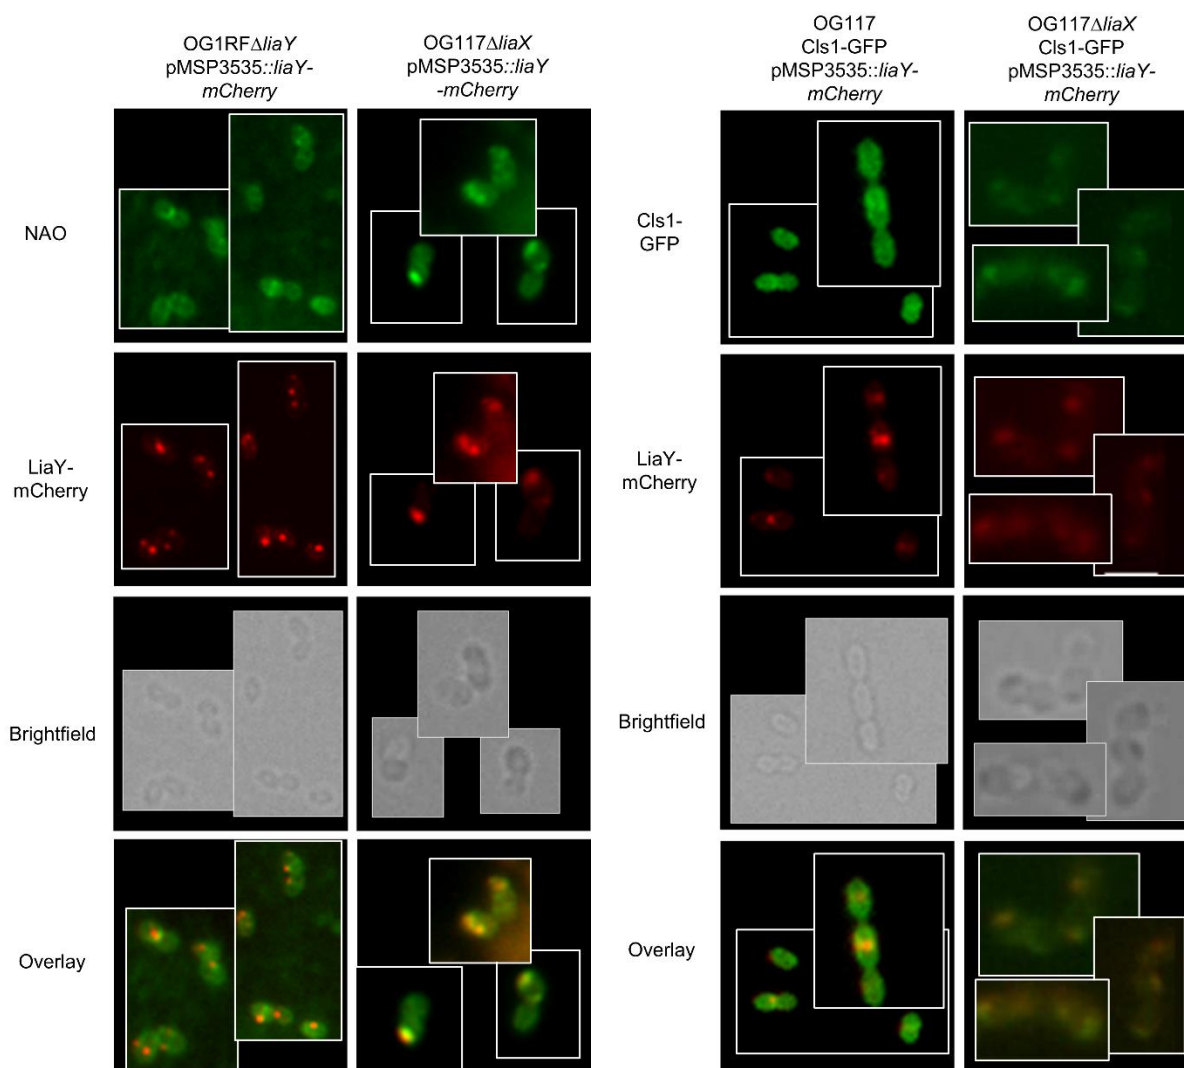

Supplementary Figure 15: Additional Images of *LiaY* and *Cls* and NAO

Evaluation of anionic phospholipid domains using NAO staining (top row) in strains listed with *mCherry* fluorescence (second row), brightfield image (third row) and overlay (bottom row). Whole images were adjusted for "Black Balance" per BZ-X800 Image Analysis Software.

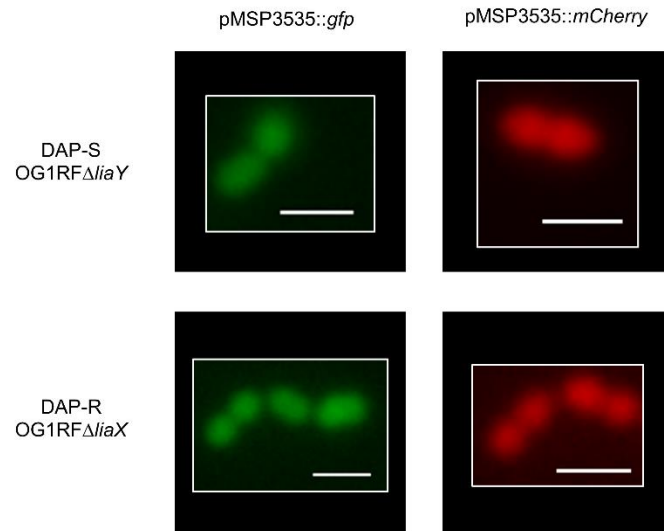

*Supplementary Figure 16: Fluorescent tags do not self-aggregate.*

Genes encoding GFP or mCherry were expressed on pMSP3535 in representative DAP-S *Efs* OG1RFΔliaY and DAP-R *Efs* OG1RFΔliaX, followed by visualization via fluorescence microscopy showing only a diffuse pattern with no discrete foci. Scale bar (white) at 2μm.

Whole images were adjusted for "Black Balance" per BZ-X800 Image Analysis Software with individual representative selected.



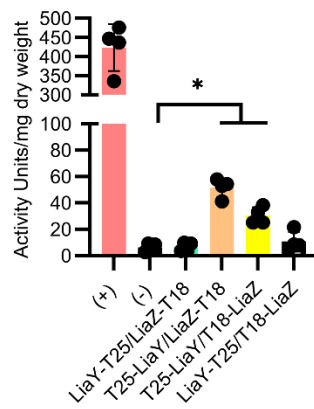

**Supplementary Figure 17. LiaY interacts with LiaZ.**

LiaY-LiaZ interactions were screened via the bacterial two hybrid system. Proteins were tagged at either the N- or C-terminus, co-transformed into *E. coli* BTH101 and activity recorded via a beta galactosidase assay. A leucine zipper interaction was used as the positive control (T18-zip/T25-zip, green bar) with two non-tagged empty vectors used as negative controls (T18/T25). A positive interaction was identified between LiaY and LiaZ when LiaY was tagged at the N-terminus (T25-LiaY). Results represent the average of 3-5 experiments. \* $p < 0.05$  via individual t-tests against (-)

**Supplementary Table 1. Enterococcus faecalis strains used in this study**

| Strain                                                                 | DAP MIC (µg/mL) | Characteristics                                                                                                                                                                           | Reference(s) |
|------------------------------------------------------------------------|-----------------|-------------------------------------------------------------------------------------------------------------------------------------------------------------------------------------------|--------------|
| OG1RF                                                                  | 2               | Laboratory strain                                                                                                                                                                         | Lab strain   |
| OG1RF $\Delta$ <i>liaX</i>                                             | 12              | OG1RF containing a full deletion of <i>liaX</i>                                                                                                                                           | 4            |
| OG1RF <i>liaX</i> *289                                                 | 12              | OG1RF containing a frameshift causing a truncation of predicted LiaX at amino acid position 289                                                                                           | 4            |
| OG1RF <i>liaX</i> *289 $\Delta$ <i>liaZ</i>                            | 8               | OG1RF <i>liaX</i> *289 with a deletion of <i>liaZ</i>                                                                                                                                     | This work    |
| OG1RF <i>liaX</i> *289 $\Delta$ <i>liaYZ</i>                           | 6               | OG1RF <i>liaX</i> *289 with deletions of <i>liaY</i> and <i>liaZ</i>                                                                                                                      | This work    |
| OG1RF <i>liaX</i> *289 $\Delta$ <i>liaYZ</i> (pMSP3535)                | 8               | OG1RF <i>liaX</i> *289 $\Delta$ <i>liaYZ</i> containing nisin-inducible pMSP3535 vector with no inserts                                                                                   | This work    |
| OG1RF <i>liaX</i> *289 $\Delta$ <i>liaYZ</i> (pMSP3535:: <i>liaY</i> ) | 24              | OG1RF <i>liaX</i> *289 $\Delta$ <i>liaYZ</i> expressing <i>liaY</i> on pMSP3535 plasmid under the control of the nisin-inducible <i>nis</i> promoter.                                     | This work    |
| OG1RF <i>liaX</i> *289 $\Delta$ <i>liaYZ</i> pMSP3535:: <i>liaYZ</i>   | 24              | OG1RF <i>liaX</i> *289 $\Delta$ <i>liaYZ</i> expressing both <i>liaY</i> and <i>liaZ</i> on pMSP3535 plasmid under the control of the nisin-inducible <i>nis</i> promoter.                | This work    |
| OG1RF <i>liaX</i> *289 $\Delta$ <i>liaYZ</i> (pAT392)                  | 4               | OG1RF <i>liaX</i> *289 $\Delta$ <i>liaYZ</i> containing plasmid pAT392 with no inserts.                                                                                                   | This work    |
| OG1RF <i>liaX</i> *289 $\Delta$ <i>liaYZ</i> pAT392:: <i>liaY</i>      | 8               | OG1RF <i>liaX</i> *289 $\Delta$ <i>liaYZ</i> expressing <i>liaY</i> on pAT392 plasmid under the control of the P2 promoter.                                                               | This work    |
| OG1RF <i>liaX</i> *289 $\Delta$ <i>liaYZ</i> pAT392:: <i>liaYZ</i>     | 8               | OG1RF <i>liaX</i> *289 $\Delta$ <i>liaYZ</i> expressing both <i>liaY</i> and <i>liaZ</i> on plasmid pAT392 under the control of the P2 promoter.                                          | This work    |
| OG117                                                                  | 1.5 - 2         | Derivative of laboratory strain <i>Efs</i> OG1RF containing constitutively expressed <i>cas9</i> for use with CRISPR-Cas9 mutagenesis in enterococci. Representative DAP-sensitive strain | 18           |
| OG117 $\Delta$ <i>cls1</i>                                             | 1               | OG117 containing a deletion of <i>cls1</i>                                                                                                                                                | This work    |
| OG117 $\Delta$ <i>cls2</i>                                             | 1               | OG117 containing a deletion of <i>cls2</i>                                                                                                                                                | This work    |
| OG117 $\Delta$ <i>cls1</i> $\Delta$ <i>cls2</i>                        | 1.5             | OG117 containing deletions of <i>cls1</i> and <i>cls2</i>                                                                                                                                 | This work    |

|                                                                                                |      |                                                                                                                                                                                         |           |
|------------------------------------------------------------------------------------------------|------|-----------------------------------------------------------------------------------------------------------------------------------------------------------------------------------------|-----------|
| OG117 $\Delta$ <i>liaX</i>                                                                     | 8-12 | OG117 containing a full deletion of <i>liaX</i> . Representative DAP-R strain with an activated LiaFSR system                                                                           | This work |
| OG117 $\Delta$ <i>liaX</i> $\Delta$ <i>cls1</i>                                                | 8    | OG117 $\Delta$ <i>liaX</i> containing a deletion of <i>cls1</i>                                                                                                                         | This work |
| OG117 $\Delta$ <i>liaX</i> $\Delta$ <i>cls2</i>                                                | 12   | OG117 $\Delta$ <i>liaX</i> containing a deletion of <i>cls2</i>                                                                                                                         | This work |
| OG117 $\Delta$ <i>liaX</i> $\Delta$ <i>cls1</i> $\Delta$ <i>cls2</i>                           | 4    | OG117 $\Delta$ <i>liaX</i> containing deletions of <i>cls1</i> and <i>cls2</i>                                                                                                          | This work |
| OG117 $\Delta$ <i>liaX</i> $\Delta$ <i>cls1</i> $\Delta$ <i>cls2</i> (pAT392)                  | 4    | OG117 $\Delta$ <i>liaX</i> $\Delta$ <i>cls1</i> $\Delta$ <i>cls2</i> containing plasmid pAT392 vector with no inserts.                                                                  | This work |
| OG117 $\Delta$ <i>liaX</i> $\Delta$ <i>cls1</i> $\Delta$ <i>cls2</i> (pAT392:: <i>cls1</i> )   | 24   | OG117 $\Delta$ <i>liaX</i> $\Delta$ <i>cls1</i> $\Delta$ <i>cls2</i> containing <i>cls1</i> expressed from pAT392 vector under the control of the P2 promoter.                          | This work |
| OG117 $\Delta$ <i>liaX</i> $\Delta$ <i>cls1</i> $\Delta$ <i>cls2</i> (pAT392:: <i>cls2</i> )   | 16   | OG117 $\Delta$ <i>liaX</i> $\Delta$ <i>cls1</i> $\Delta$ <i>cls2</i> containing <i>cls2</i> expressed from pAT392 vector under the control of the P2 promoter.                          | This work |
| OG117 $\Delta$ <i>liaX</i> $\Delta$ <i>cls1</i> $\Delta$ <i>cls2</i> (pMSP3535)                | 4    | OG117 $\Delta$ <i>liaX</i> $\Delta$ <i>cls1</i> $\Delta$ <i>cls2</i> containing nisin-inducible pMSP3535 plasmid with no inserts.                                                       | This work |
| OG117 $\Delta$ <i>liaX</i> $\Delta$ <i>cls1</i> $\Delta$ <i>cls2</i> (pMSP3535:: <i>cls1</i> ) | 16   | OG117 $\Delta$ <i>liaX</i> $\Delta$ <i>cls1</i> $\Delta$ <i>cls2</i> containing <i>cls1</i> expressed on pMSP3535 plasmid under the control of the nisin-inducible <i>nis</i> promoter. | This work |
| OG117 $\Delta$ <i>liaX</i> $\Delta$ <i>cls1</i> $\Delta$ <i>cls2</i> (pMSP3535:: <i>cls2</i> ) | 8    | OG117 $\Delta$ <i>liaX</i> $\Delta$ <i>cls1</i> $\Delta$ <i>cls2</i> containing <i>cls2</i> expressed on pMSP3535 plasmid under the control of the nisin-inducible <i>nis</i> promoter  | This work |

DAP, daptomycin; MIC, minimal inhibitory concentrations.

**Supplementary Table 2. Primers used in this study**

| Primer                              | Sequence 5' → 3'                                                | Description (F, forward. R, reverse)                                                     |
|-------------------------------------|-----------------------------------------------------------------|------------------------------------------------------------------------------------------|
| <b>Deletion of <i>cls1</i></b>      |                                                                 |                                                                                          |
| FrA_ <i>cls1</i> _F                 | atattacagctccagatccatataccttcttCA<br>AAATTGGATCAAAAAGAA         | F, lowercase: plasmid, uppercase:<br>fragment upstream of <i>cls1</i>                    |
| FrA_ <i>cls1</i> _R                 | TCATTTTGTGAAAAACAGTTTT<br>GTCCTCCTCCTTTATTTGTTA                 | R, upstream of <i>cls1</i>                                                               |
| FrB_ <i>cls1</i> _F                 | CAAATAAAGGAGGAAGACAAA<br>ACTGTTTTTCACAAAATGACG                  | F, downstream of <i>cls1</i>                                                             |
| FrB_ <i>cls1</i> _R                 | gaagcgaaaaaggagaagtcggttcaga<br>aaAAGACTGTCCACATTATGTT<br>GC    | R, lowercase: plasmid, uppercase:<br>fragment downstream of <i>cls1</i>                  |
| Spacer_ <i>cls1</i> _F              | GTTTTGAACTTTATAGTCAAAA<br>GATGCCGAgtttagagtcattgtttag<br>aatgg  | F, lowercase: plasmid, uppercase:<br>spacer sequence within <i>cls1</i>                  |
| Spacer_ <i>cls1</i> _R              | TCGGCATCTTTTGACTATAAAG<br>TTCAAAACtttcattgctattatacccatgt<br>ag | F, lowercase: plasmid, uppercase:<br>spacer sequence within <i>cls1</i>                  |
| <b>Deletion of <i>cls2</i></b>      |                                                                 |                                                                                          |
| FrA_ <i>cls2</i> _F                 | agctccagatccatataccttcttACCCAA<br>GTGATTACGATTGAC               | F, lowercase: plasmid, uppercase:<br>fragment upstream of <i>cls2</i>                    |
| FrA_ <i>cls2</i> _R                 | CTGATTTATTGACGCTTACCTC<br>CTTCTTACTTC                           | R, upstream of <i>cls2</i>                                                               |
| FrB_ <i>cls2</i> _F                 | AGGAGGTAAGCGTCAATAAAT<br>CAGCAGTGAATG                           | F, downstream of <i>cls2</i>                                                             |
| FrB_ <i>cls2</i> _R                 | cgaaaaaggagaagtcggttcagaaaTC<br>TGGAATGACTTTTTTCCAA             | R, lowercase: plasmid, uppercase:<br>fragment downstream of <i>cls2</i>                  |
| Spacer_ <i>cls2</i> _F              | TTACTGGCGAGATACCCATAT<br>TCGTTTGGTgtttagagtcattgtttag<br>gaatgg | F, lowercase: plasmid, uppercase:<br>spacer sequence within <i>cls2</i>                  |
| Spacer_ <i>cls2</i> _R              | ACCAAACGAATATGGGTATCT<br>CGCCAGTAAttcattgctattatacccat<br>gtag  | F, lowercase: plasmid, uppercase:<br>spacer sequence within <i>cls2</i>                  |
| <b>Other <i>cls1</i> constructs</b> |                                                                 |                                                                                          |
| BamHI_ <i>cls1</i> _pA<br>T_F       | CGGGATCCTAACAAATAAAGG<br>AGGAAGACAATTG                          | F, for cloning <i>cls1</i> into pAT392,<br>containing BamHI site                         |
| XbaI_ <i>cls1</i> _pAT_<br>R        | CGTCTAGATTAAAGAATTGGT<br>GAAAATAATCGTG                          | R, for cloning <i>cls1</i> into pAT392,<br>containing XbaI site                          |
| <i>cls1-gfp</i> _FrA_F              | CTCCAGATCCATATCCTTCTTG<br>GATCATATCGGTACCAAAA                   | F, for construction of chromosomal<br>insertion of GFP tag to <i>Cls1</i> via<br>CRISPR. |
| <i>cls1-gfp</i> _FrA_R              | AATTTGTAACCTTCGTATATCTT<br>GATTG                                | R, for construction of chromosomal<br>insertion of GFP tag to <i>Cls1</i> via<br>CRISPR  |
| <i>cls1-gfp</i> _FrA2_F             | AATCAAGATATACGAAGTTACA<br>AATTAAAC                              | F, for construction of chromosomal<br>insertion of GFP tag to <i>Cls1</i> via<br>CRISPR  |

|                                     |                                                                 |                                                                                   |
|-------------------------------------|-----------------------------------------------------------------|-----------------------------------------------------------------------------------|
| <i>cls1-gfp_FrA2_R</i>              | ACTACTGCCACCAAGAATTGG<br>TGAAAATAATCGTG                         | R, for construction of chromosomal insertion of GFP tag to <i>Cls1</i> via CRISPR |
| <i>cls1-gfp_GFP_F</i>               | CAATTCTTGGTGGCAGTAGTA<br>AAGGAGAAGAACTTTTC                      | F, for construction of chromosomal insertion of GFP tag to <i>Cls1</i> via CRISPR |
| <i>cls1-gfp_GFP_R</i>               | GTGAAAAACAGTTTTATTTGTA<br>TAGTTCATCCATG                         | R, for construction of chromosomal insertion of GFP tag to <i>Cls1</i> via CRISPR |
| <i>cls1-gfp_FrB_F</i>               | GAACTATACAAATAAACTGTT<br>TTTCACAAAATGA                          | F, for construction of chromosomal insertion of GFP tag to <i>Cls1</i> via CRISPR |
| <i>cls1-gfp_FrB_R</i>               | AAGGAGAAGTCGGTTCAGAAA<br>AAGACTGTCCACATTATGTT                   | R, for construction of chromosomal insertion of GFP tag to <i>Cls1</i> via CRISPR |
| <i>cls1-gfp_spacer_F</i>            | GCATTTGCTTCAAAGTTTAATT<br>TGTAAGTTGTTTTAGAGTCATG<br>TTGTTTAG    | F, for construction of chromosomal insertion of GFP tag to <i>Cls1</i> via CRISPR |
| <i>cls1-gfp_spacer_R</i>            | AAGTTACAAATTAAGCTTTGAA<br>GCAAATGCTTTCATTGCTATTA<br>TACCCATGTAG | R, for construction of chromosomal insertion of GFP tag to <i>Cls1</i> via CRISPR |
| <b>Other <i>cls2</i> constructs</b> |                                                                 |                                                                                   |
| BamHI_ <i>cls2</i> _pm<br>sp_F      | CGGGATCCTAATCTTAGTATG<br>AAGTAAGAAGGAGGTAAGCG                   | F, for cloning <i>cls2</i> into pMSP3535 containing BamHI site                    |
| XbaI_ <i>cls2</i> _pmsp<br>_R       | GCTCTAGATTACAAGACTGGT<br>GACAACAAGCG                            | R, for cloning <i>cls2</i> into pMSP3535 containing XbaI site                     |
| BamHI_ <i>cls2</i> _pat<br>_F       | TCGGTACCCGGGGATCCTCTT<br>AGTATGAAGTAAGAAGGAGGT<br>AAGCG         | F, for cloning <i>cls2</i> into pAT392 containing BamHI site                      |
| XbaI_ <i>cls2</i> _pat<br>R         | GCAAGGGGAATTGACTCTAGA<br>TTACAAGACTGGTGACAACAA<br>GCG           | R, for cloning <i>cls2</i> into pAT392 containing BamHI site                      |
| <i>gfp-cls2_cls2_F</i>              | ACAAAGGTGGCAGTAAAATTT<br>TTGTTTGGATTTTG                         | F, for cloning <i>gfp-cls2</i> into pMSP3535                                      |
| <i>gfp-cls2_cls2_R</i>              | AGACCGGCCTCGAGTCTAGAT<br>TACAAGACTGGTGACAAC                     | R, for cloning <i>gfp-cls2</i> into pMSP3535                                      |
| <i>gfp-cls2_GFP_F</i>               | TCTTGGGTGGCAGTAGTAAAG<br>GAGAAGAACTTTTC                         | F, for cloning <i>gfp-cls2</i> into pMSP3535                                      |
| <i>gfp-cls2_GFP_R</i>               | AATTTTACTGCCACCTTTGTAT<br>AGTTCATCCATGC                         | R, for cloning <i>gfp-cls2</i> into pMSP3535                                      |
| <b>Deletion of <i>liaY</i></b>      |                                                                 |                                                                                   |
| FrA_ <i>liaY</i> _F                 | CGGGATCCGACATTGATGTGG<br>ATGATGAAA                              | F, fragment upstream of <i>liaY</i> . <u>BamHI</u> site                           |
| FrA_ <i>liaY</i> _R                 | CAATCGCTGAAAATATGTCATA<br>TGTTTTACCTCGTCTAC                     | R, fragment upstream of <i>liaY</i> .                                             |
| FrB_ <i>liaY</i> _F                 | ATGACATATTTTCAGCGATTG<br>GTTGTTAATACTGACAT                      | F, fragment downstream of <i>liaY</i> .                                           |
| FrB_ <i>liaY</i> _R                 | CGGAATTCAATCAAGGACGAG<br>AACCAATC                               | R, fragment downstream of <i>liaY</i> . <u>EcoRI</u> site                         |
| <b>Deletion of <i>liaYZ</i></b>     |                                                                 |                                                                                   |

|                                                |                                                       |                                                                              |
|------------------------------------------------|-------------------------------------------------------|------------------------------------------------------------------------------|
| FrA_ <i>liaYZ</i> _F                           | GCTCTAGAGACATTGATGTGG<br>ATGATGAAA                    | F, fragment upstream of <i>liaYZ</i> . <u>XbaI</u><br>site                   |
| FrA_ <i>liaYZ</i> _R                           | ATGTTTTACCTCATCTACTAA<br>ATTTTACACTAGAAAGGC           | R, fragment upstream of <i>liaYZ</i> .                                       |
| FrB_ <i>liaYZ</i> _F                           | AGTAGATGAGGTGAAAACATA<br>AAAAGCCTGAAGAACGTAGCA        | F, fragment downstream of <i>liaYZ</i> .                                     |
| FrB_ <i>liaYZ</i> _R                           | CGGGATCCATCGGCCGCGCT<br>ACAATCGC                      | R, fragment downstream of <i>liaYZ</i> .<br><u>BamHI</u> site                |
| <b>Other <i>liaY</i> constructs</b>            |                                                       |                                                                              |
| BamHI_ <i>liaY</i> _F                          | CGGGATCCACGAGGTGAAAA<br>CATATGAAAAG                   | F, upstream of <i>liaY</i> start codon<br><u>BamHI</u> site                  |
| XbaI_ <i>liaY</i> _R                           | GCTCTAGATTAAAAGTCACTC<br>CATTCGTCATC                  | R, 3' end of <i>liaY</i> including stop codon.<br><u>XbaI</u> site           |
| <i>liaY</i> -<br><i>mCherry</i> _liaY_F        | CAGGAGACTCTGCATGGATCC<br>TAGTAGACGAGGTGAAAACAT<br>ATG | F, for cloning of <i>liaY</i> -mCherry into<br>pMSP3535, contains BamHI site |
| <i>liaY</i> -<br><i>mCherry</i> _liaY_R        | CTTGGAACGCTTCGCCACA<br>ACATCCTGGACAACAGC              | R, for cloning of <i>liaY</i> -mCherry into<br>pMSP3535                      |
| <i>liaY</i> -<br><i>mCherry</i> _mCher<br>ry_F | GTGGCGGAAGCGTTTCCAAG<br>GGCGAGGAGG                    | F, for cloning of <i>liaY</i> -mCherry into<br>pMSP3535                      |
| <i>liaY</i> -<br><i>mCherry</i> _mCher<br>ry_R | AGACCGGCCTCGAGTCTAGAT<br>TATTTGTACAGCTCATCCATGC<br>C  | R, for cloning of <i>liaY</i> -mCherry into<br>pMSP3535, contains XbaI site  |
| <i>liaY</i> -<br><i>mCherry</i> _Q5_F          | GTTTCCAAGGGCGAGGAG                                    | F, generation of pMSP3535 mCherry<br>control through Q5 mutagenesis          |
| <i>liaY</i> -<br><i>mCherry</i> _Q5_R          | CATATGTTTTACCTCGTCTAC                                 | R, generation of pMSP3535 mCherry<br>control through Q5 mutagenesis          |
| <b>Complementation of <i>liaYZ</i></b>         |                                                       |                                                                              |
| BamHI_ <i>liaYZ</i> _F                         | CGGGATCCACGAGGTGAAAA<br>CATATGAAAAG                   | F, upstream of <i>liaY</i> start codon<br><u>BamHI</u> site                  |
| XbaI_ <i>liaYZ</i> _R                          | GCTCTAGATTATTCATATTTTCG<br>ATAAATTGTG                 | R, 3' end of <i>liaZ</i> including stop codon.<br><u>XbaI</u> site           |
| <b>Bacterial Two Hybrid Studies</b>            |                                                       |                                                                              |
| <i>cls1</i> _F                                 | CGCGGATCCGATTCTTAGCGT<br>CTTAACAGT                    | F, for cloning <i>cls1</i> into pKT25/pKNT25<br>or pUT18/pUT18C              |
| <i>cls1</i> _R                                 | CCGGAATTCAGAATTGGTGAA<br>AATAATCGT                    | R, for cloning <i>cls1</i> into<br>pKNT25/pUT18                              |
| <i>cls1</i> _R2                                | CCGGAATTCTTTAAAGAATTG<br>GTGAAAAT                     | R, for cloning <i>cls1</i> into<br>pKT25/pUT18C, contains stop codon         |
| <i>cls2</i> _F                                 | CGCGGATCCGAAAATTTTGT<br>TTGGATTTT                     | F, for cloning <i>cls2</i> into pKT25/pKNT25<br>or pUT18/pUT18C              |
| <i>cls2</i> _R                                 | CCGGAATTCAAGACTGGTGAC<br>AACAAGC                      | R, for cloning <i>cls2</i> into<br>pKNT25/pUT18                              |
| <i>cls2</i> _R2                                | CCGGAATTCATTACAAGACTG<br>GTGACAACA                    | R, for cloning <i>cls2</i> into<br>pKT25/pUT18C, contains stop codon         |
| <i>liaY</i> _F                                 | CGCGGATCCGAAAAGAAACT<br>AACAAAATCTCCG                 | F, for cloning <i>liaY</i> into pKT25/pKNT25<br>or pUT18/pUT18C              |

|                |                                         |                                                                      |
|----------------|-----------------------------------------|----------------------------------------------------------------------|
| <i>liaY_R</i>  | CCGGAATTCAAGTCACTCCAT<br>TCGTCATC       | R, for cloning <i>liaY</i> into<br>pKNT25/pUT18                      |
| <i>liaY_R2</i> | CCGGAATTCATTAAGTCAC<br>TCCATTCGTCAT     | R, for cloning <i>liaY</i> into<br>pKT25/pUT18C, contains stop codon |
| <i>liaZ_F</i>  | CGCGGATCCGACATATTTTCA<br>GCGATTGGT      | F, for cloning <i>liaZ</i> into pKT25/pKNT25<br>or pUT18/pUT18C      |
| <i>liaZ_R</i>  | CCGGAATTCTCATATTTTCGATA<br>AATTGTGAT    | R, for cloning <i>liaZ</i> into pKNT25/pUT18                         |
| <i>liaZ_R2</i> | CCGGAATTCTTTTATTCATATT<br>TCGATAAATTGTG | R, for cloning <i>liaZ</i> into<br>pKT25/pUT18C, contains stop codon |
| <b>qRT-PCR</b> |                                         |                                                                      |
| <i>16S_F</i>   | GGAGACTTGAGTGCAGAAGA                    | F, Housekeeping gene, 16S rRNA of<br>OG1RF                           |
| <i>16S_R</i>   | CGTCAGTTACAGACCAGAGAG                   | R, Housekeeping gene, 16S rRNA of<br>OG1RF                           |
| <i>gyrB_F</i>  | AAAAGGCATGTTGGCTTCAAA                   | F, Housekeeping gene, <i>gyrB</i> of<br>OG1RF                        |
| <i>gyrB_R</i>  | GCTTCCCTGGCAAGTTGCTA                    | R, Housekeeping gene, <i>gyrB</i> of<br>OG1RF                        |
| <i>cls1_F</i>  | GGTGCCAGAGGCAAATACAT                    | F, to amplify <i>cls1</i> for qRT-PCR                                |
| <i>cls1_R</i>  | AATACGGCGTTTGAATCCAG                    | R, to amplify <i>cls1</i> for qRT-PCR                                |
| <i>cls2_F</i>  | GTTGTTAGTGGCGGTTTCGTT                   | F, to amplify <i>cls2</i> for qRT-PCR                                |
| <i>cls2_R</i>  | TTAATGCCGCGTTTGTGTAA                    | R, to amplify <i>cls2</i> for qRT-PCR                                |

**Supplementary Table 3: *liaS* mutations in Efs OG1RFΔ*liaX*\*289Δ*liaY***

| Gene        | Predicted Change |
|-------------|------------------|
| <i>liaS</i> | Ala316→Thr       |

**Supplementary Table 4: Reagents**

| Reagent                         | Source              | Catalog Number |
|---------------------------------|---------------------|----------------|
| Luria Bertani Broth/Agar        | BD                  | 244620/244520  |
| Brain Heart Infusion Broth/Agar | BD                  | 237500/241830  |
| Tryptic Soy Broth               | BD                  | B257543        |
| Erythromycin                    | Sigma-Aldrich       | E5389          |
| Gentamicin                      | Sigma-Aldrich       | G3632          |
| Daptomycin                      | Morris& Dickson     | 650903         |
| Chloramphenicol                 | Sigma-Aldrich       | C1919          |
| Nisin                           | Sigma-Aldrich       | N5764          |
| Spectinomycin                   | Sigma-Aldrich       | S4014          |
| Kanamycin                       | Sigma-Aldrich       | K1377          |
| Ampicillin                      | Sigma-Aldrich       | A9393          |
| IPTG                            | GoldBio             | I2481C         |
| o-nitrophenol-β-galactoside     | Sigma-Aldrich       | N1127          |
| Sodium carbonate                | Fisher              | S263-500       |
| Toluene                         | Fisher              | T324-500       |
| 10% SDS solution                | Fisher              | 15553027       |
| p-chloro-phenylalanine          | Sigma-Aldrich       | C6506          |
| Phusion                         | New England BioLabs | M0530          |



|                                                         |                        |          |
|---------------------------------------------------------|------------------------|----------|
| PrimeStar Max                                           | Takara Bio             | R045B    |
| Gibson Assembly Cloning Kit                             | New England BioLabs    | E5510S   |
| GoTaq DNA Polymerase                                    | Promega                | M3001    |
| E-test (Daptomycin)                                     | Biomerieux             | 412323   |
| 10-N-nonyl acridine orange                              | Invitrogen             | A1372    |
| TC-ReAsH™ II In-Cell<br>Tetracysteine Tag Detection Kit | Invitrogen             | T34562   |
| Bacterial Two Hybrid Kit                                | Euromedex              | EUK001   |
| Chloroform                                              | FisherChemical, Optima | C2974    |
| Methanol                                                | FisherChemical, Optima | A456-4   |
| Acetonitrile                                            | FisherChemical, Optima | A996SK-4 |
| PE 15:0/15:0                                            | Avanti Polar Lipids    | 850704   |
